# Supplementary material for: Expression of ATP/GTP Binding Protein 1 Has Prognostic Value for the Clinical Outcomes in Non-Small Cell Lung Carcinoma
Source: J Pers Med. 2020 Dec 2;10(4):263. doi: 10.3390/jpm10040263 (PMC7761608; doi:10.3390/jpm10040263)
Supplement: Supplementary file 1 [file jpm-10-00263-s001.tgz]

Archive with 5 entries (5 files):
- Supplementary Figure_S3.docx
- Supplementary Figure_S4.docx
- Supplementary Table_S1.docx
- Supplementary Figure_S1.docx
- Supplementary Figure_S2.docx
